# Supplementary material for: Non-native terrestrial slugs from Sinaloa, Mexico: Deroceraslaeve (O. F. Müller, 1774) and Sarasinulaplebeia (P. Fischer, 1868) (Mollusca, Gastropoda)
Source: Biodivers Data J. 2022 Aug 4;10:e87666. doi: 10.3897/BDJ.10.e87666 (PMC9848535; doi:10.3897/BDJ.10.e87666)
Supplement: Supplementary material 1 — GenBank accession numbers of sequences used in the phylogenetic inference of Deroceraslaeve (Fig. 2) [file bdj-10-e87666-s001.csv]

Species	# of sequence	Collection Locality
Deroceras invadens	MH830231	Italy: Caprarico Valle
Deroceras invadens	MH830218	United Kingdom: Cardiff
Deroceras invadens	MH830235	Switzerland: Kirchenfeld
Deroceras invadens	MH830221	France: Etaples
Deroceras invadens	MH830237	Belgium: Bertrix
Deroceras invadens	MH830216	Italy: Falcone
Deroceras invadens	MH830234	Italy: Santa Marina Salina
Deroceras invadens	MH830213	Italy: Gioia Tauro
Deroceras invadens	MH830232	Italy: Bellafemmina
Deroceras invadens	MH830233	Italy: Contrada Ridente
Deroceras invadens	MH830214	Italy: Palazzolo Acreide
Deroceras invadens	MH830220	Italy: Caronia
Deroceras invadens	MH830215	Italy: Acquacalda
Deroceras invadens	MH830219	Germany: Sangerhausen
Deroceras invadens	MH830236	Germany: Siegen
Deroceras invadens	MH830238	Italy: Montecristo
Deroceras invadens	MH830228	United Kingdom: Pontefract
Deroceras invadens	MH830217	United Kingdom: Portsmouth
Deroceras invadens	MH830230	Austria: Innsbruck
Deroceras invadens	MH830229	Italy: Elba, Lacona
Deroceras laeve	MG423379	Canada: Manitoba, Churchill, 2 km NW Churchill, Cape Merry
Deroceras laeve	MG421092	Canada: Manitoba, Churchill, 9 km E Churchill, Bear Trap Lane, Bear Trap Lane
Deroceras laeve	MG422986	Canada: Manitoba, Churchill, 10 km SE Churchill, Farnworth Lake, pitfall trap
Deroceras laeve	MG421234	Canada: Manitoba, Churchill, 22 km E Churchill, CNSC
Deroceras laeve	MG421537	Canada: Manitoba, Churchill, 9 km E Churchill, Bear Trap Lane, Bear Trap Lane
Deroceras laeve	MG421628	Canada: Manitoba, Churchill, 2 km S Churchill, Beech Bay
Deroceras laeve	MG423224	Canada: Manitoba, Churchill, 26 km SE Churchill, Twin Lakes burn site, Burn area Boreal Forest
Deroceras laeve	MF544928	Canada: Alberta, Jasper National Park, Highway 16, Athabasca River, NE of Jasper Lake
Deroceras laeve	MF544874	Canada: Alberta, Jasper National Park, Highway 16, Athabasca River, NE of Jasper Lake
Deroceras laeve	MF544389	Canada: Alberta, Jasper National Park, Highway 16, Athabasca River, NE of Jasper Lake
Deroceras laeve	MF545028	Canada: Alberta, Jasper National Park, Highway 16, Athabasca River, NE of Jasper Lake
Deroceras laeve	MF545021	Canada: Alberta, Jasper National Park, Highway 16, Athabasca River, NE of Jasper Lake
Deroceras laeve	MF544988	Canada: Alberta, Jasper National Park, Highway 16, Athabasca River, NE of Jasper Lake
Deroceras laeve	MF544905	Canada: Alberta, Jasper National Park, Highway 16, Athabasca River, NE of Jasper Lake
Deroceras laeve	MF544857	Canada: Alberta, Jasper National Park, Highway 16, Athabasca River, NE of Jasper Lake
Deroceras laeve	MF544849	Canada: Alberta, Jasper National Park, Highway 16, Athabasca River, NE of Jasper Lake
Deroceras laeve	MF544817	Canada: Alberta, Jasper National Park, Highway 16, Athabasca River, NE of Jasper Lake
Deroceras laeve	MF544553	Canada: Alberta, Jasper National Park, Pocahontas Campground, Site C21
Deroceras laeve	MF544528	Canada: Alberta, Jasper National Park, Highway 16, Athabasca River, NE of Jasper Lake
Deroceras laeve	MF544449	Canada: Alberta, Jasper National Park, Pocahontas Campground, Site C21
Deroceras laeve	MF544318	Canada: Alberta, Jasper National Park, Highway 16, Athabasca River, NE of Jasper Lake
Deroceras laeve	MF544256	Canada: Alberta, Jasper National Park, Highway 16, Athabasca River, NE of Jasper Lake
Deroceras laeve	MF544220	Canada: Alberta, Jasper National Park, Highway 16, Athabasca River, NE of Jasper Lake
Deroceras laeve	KM612188	Canada: Alberta, Jasper NP, Highway 16, Athabasca River
Deroceras laeve	KM611814	Canada: Alberta, Banff NP, Fairview Trail, Upper Lake Louise Area
Deroceras laeve	MG422916	Canada: Manitoba, Churchill, 23 km E Churchill, Ramsay Creek
Deroceras laeve	MG422732	Canada: Manitoba, Churchill, 22 km E Churchill, CNSC
Deroceras laeve	MG422722	Canada: Manitoba, Churchill, 26 km SE Churchill, Twin Lakes burn site, Burn area Boreal Forest
Deroceras laeve	MG422561	Canada: Manitoba, Churchill, 22 km E Churchill, CNSC
Deroceras laeve	MG422209	Canada: Manitoba, Churchill, 22 km E Churchill, CNSC
Deroceras laeve	MF545081	Canada: British Columbia, Yoho National Park, Bunkhouse
Deroceras laeve	MG421995	Canada: Manitoba, Churchill, 9 km E Churchill, Bear Trap Lane, Bear Trap Lane
Deroceras laeve	MG423249	Canada: Ontario, Chatham-Kent County, Walpole First Nation
Deroceras laeve	KX781888	USA: Minnesota, Carleton College Arboretum, Northfield, Found on wall of underpass of highway 19
Deroceras laeve	MF544949	Canada: Ontario, Bruce Peninsula National Park, Johnston Wood
Deroceras laeve	MG423214	Canada: Ontario, University Guelph, Biodiversity Institute of Ontario
Deroceras laeve	MT941436	Spain: Costa Brava
Deroceras laeve	MW507142	Japan
Deroceras laeve	KF894311	United Kingdom: West Gloucestershire (VC34)
Deroceras laeve	MH295745	Poland
Deroceras laeve	MH295746	Poland
Deroceras laeve	MH295747	Poland
Deroceras laeve	MT680918	Canada
Deroceras laeve	MH295748	Poland
Deroceras laeve	MT941435	Viet Nam: Fansipan Peak
Deroceras laeve	EF128217	Guansi, Hsinchu Co., Taiwan
Deroceras laeve	MG421933	Canada: Manitoba, Churchill, 2 km S Churchill, Beech Bay
Deroceras laeve	MG422995	Canada: Manitoba, Churchill, 2 km S Churchill, Beech Bay
Deroceras laeve	MG421572	Canada: British Columbia, Burnt Cabin Bog Ecological Reserve, near Banner Mountainlodge
Deroceras laeve	MG421532	Canada: Manitoba, Churchill, 2 km S Churchill, Beech Bay
Deroceras laeve	MG423146	Canada: Manitoba, Churchill, 2 km S Churchill, Beech Bay
Deroceras laeve	MG421664	Canada: Manitoba, Churchill, 2 km S Churchill, Beech Bay
Deroceras laeve	MT680915	Canada
Deroceras laeve	MG423181	Canada: Ontario, Cambridge, rare Charitable Research Reserve, Site 1 — Field Edge Forest
Deroceras laeve	MG422767	Canada: New Brunswick, Albrights Corner, block SE
Deroceras laeve	MG423231	Canada: New Brunswick, Albrights Corner, block SE
Deroceras laeve	MG421043	Canada: New Brunswick, Albrights Corner, block SE
Deroceras laeve	MF544237	Canada: New Brunswick, Fundy National Park, Caribou Plain Trail
Deroceras laeve	MF544725	Canada: New Brunswick, Fundy National Park, Caribou Plain Trail
Deroceras laeve	MF545090	Canada: New Brunswick, Fundy National Park, Coastal Trail
Deroceras laeve	MF544776	Canada: New Brunswick, Fundy National Park, Maple Grove Trail
Deroceras laeve	MF544851	Canada: New Brunswick, Fundy National Park, Maple Grove Trail
Deroceras laeve	MF544959	Canada: New Brunswick, Fundy National Park, Maple Grove Trail
Deroceras laeve	MF544861	Canada: Nova Scotia, Cape Breton Highlands National Park, Benjies Lake Trail
Deroceras laeve	KM611883	Canada: Ontario, Pukaskwa NP, Bimose Kinoomagewnan Trail
Deroceras laeve	MG423457	Canada: New Brunswick, Portabello Creek Natural Wildlife Area, Oxbow, other side of road
Deroceras laeve	MF544424	Canada: New Brunswick, Fundy National Park, Caribou Plain Trail
Deroceras laeve	KP976442	Canada: Newfoundland and Labrador, Gros Morne National Park, James Callaghan Trail (aka Gros Morne Trail)
Deroceras laeve	MF544359	Canada: Nova Scotia, Cape Breton Highlands National Park, Paquette Lake Rd.
Deroceras laeve	MF545139	Canada: New Brunswick, Fundy National Park, Caribou Plain Trail
Deroceras laeve	MF544396	Canada: New Brunswick, Fundy National Park, Caribou Plain Trail
Deroceras laeve	HM584699	Locality not posted on GenBank
Deroceras laeve	MG422774	Canada: New Brunswick, Portabello Creek Natural Wildlife Area, Oxbow, other side of road
Deroceras laeve	MG422256	Canada: New Brunswick, Portabello Creek Natural Wildlife Area, Oxbow, other side of road
Deroceras laeve	MG423054	Canada: Ontario, Claireville
Deroceras laeve	MG421877	Canada: Ontario, Cambridge, rare Charitable Research Reserve, Site 1 — Field Edge Forest
Deroceras laeve	MG423575	Canada: Ontario, Cold Creek
Deroceras laeve	MG421878	Canada: Ontario, Essex County, Middle Island
Deroceras laeve	MG422990	Canada: Ontario, Essex County, Middle Island
Deroceras laeve	MG422989	Canada: Ontario, Essex County, Middle Island
Deroceras laeve	MF544999	Canada: Ontario, Point Pelee National Park, Woodland Trail
Deroceras laeve	MF544278	Canada: Ontario, Point Pelee National Park, Woodland Trail
Deroceras laeve	MG422707	Canada: Ontario, Essex County, Middle Island
Deroceras laeve	MG422765	Canada: Ontario, Essex County, Middle Island
Deroceras laeve	MG421212	Canada: Ontario, Pelee Island, Richard and Beryl, Ivey Nature Reserve
Deroceras laeve	MG423141	Canada: Ontario, Essex County, Middle Island
Deroceras laeve	MG422304	Canada: Ontario, Essex County, Middle Island
Deroceras laeve	KX959498	Mexico, Puebla
Deroceras laeve	MG421943	Canada: Ontario, University Guelph, Arboretum
Deroceras laeve	KX959496	Mexico, Queretaro, Pinal de Amoles
Deroceras laeve	KX959500	Mexico, Oaxaca, Ixtlan de Juarez
Deroceras laeve	KX959493	Mexico, CDMX, Desierto de los Leones
Deroceras laeve	KX959497	Mexico, San Luis Potosi
Deroceras laeve	KX959495	Mexico, Puebla, Huahuchinango, Totolapa
Deroceras laeve	KX959499	Mexico, Puebla
Deroceras laeve	KX959492	Mexico, CDMX, Bosque de Tlalpan
Deroceras laeve	KX959494	Mexico, Queretaro, Ezequiel Montes
Deroceras laeve	ON678125	Mexico, Sinaloa
Deroceras laeve	KX959501	Mexico, Oaxaca, Loxicha
Deroceras laeve	MF544768	Canada: Ontario, Bruce Peninsula National Park, Cameron Lake
Deroceras laeve	KM612156	Canada: Nova Scotia, Cape Breton Highlands National Park, The Bog, Boardwalk through a fen
Deroceras reticulatum	KM611817	Canada: British Columbia, Mount Revelstoke NP, Skunk Cabbage Trl.
Deroceras reticulatum	MG423288	Canada: Ontario, Guelph, Guelph Lake Conservation Area
Deroceras reticulatum	MG423130	Canada: East Sister Island
Deroceras reticulatum	MG423180	Canada: New Brunswick, University of New Brunswick, Fredericton, Noonan block
Deroceras reticulatum	MG423215	Canada: Ontario, Wellington County, Speed river trail, Hwy 34
Deroceras reticulatum	MG423266	Canada: Ontario, Wellington County, GORBA trail, Victoria Road
Deroceras reticulatum	MG423268	Canada: Ontario, Wellington County, GORBA trail, Victoria Road
Deroceras reticulatum	MG423285	Canada: Ontario, Waterloo, Laurel Creek Conservation Area
Deroceras reticulatum	MG421373	Canada: Ontario, Mississauga, Forest Avenue Public School, EQP-CLL-496
Deroceras reticulatum	MG421618	Canada: Ontario, Essex County, Ojibway Provincial Nature Reserve
Deroceras reticulatum	MG421157	Canada: New Brunswick, University of New Brunswick, Fredericton, Noonan block
Deroceras reticulatum	MG421125	Canada: New Brunswick, University of New Brunswick, Fredericton, Noonan block
Deroceras reticulatum	MG421099	Canada: East Sister Island
Deroceras reticulatum	MG423493	Canada: Ontario, Lambton County, Clements Property near Alvinston, End of Buttonwood Road, Sydenham River
Deroceras reticulatum	MG423387	Canada: Ontario, Essex County, Ojibway Provincial Nature Reserve
Deroceras reticulatum	MG423335	Canada: Ontario, Wellington County, GORBA trail, Victoria Road
Deroceras reticulatum	MG423310	Canada: Ontario, Lambton County, Clements Property near Alvinston, End of Buttonwood Road, Sydenham River
Deroceras reticulatum	MG423318	Canada: Ontario, Wellington County, GORBA trail, Victoria Road
Deroceras reticulatum	KM611812	Canada: Ontario, Point Pelee NP, 15km SE of Leamington, Camp Henry, Big and Little Raccon Sites
Deroceras reticulatum	MG423572	Canada: Ontario, Brantford, Apps Mill Nature Centre
Limax maximus	KF894386	United Kingdom: Northeast Yorkshire (VC62)
Limax maximus	KM612139	Canada: Newfoundland and Labrador, Gros Morne NP, Berry Hill, Parking Lot
